# Supplementary material for: Two-dimensional SnS2 nanosheets exfoliated from an inorganic–organic hybrid with enhanced photocatalytic activity towards Cr(vi) reduction
Source: Royal Society of Chemistry journal article supplement (doi:10.1039/c9qi00020h), 2019-01-01
Supplement: c9qi00020h1.pdf [file c9qi00020h1.pdf]

## Electronic Supplementary Information

# Two-Dimensional SnS<sub>2</sub> Nanosheets Exfoliated from Inorganic-Organic Hybrid toward Enhanced Photocatalytic Cr(VI) Reduction

Yongping Liu<sup>a,b</sup>, Xihong Mi<sup>a</sup>, Jixiang Wang<sup>a</sup>, Ming Li<sup>a</sup>, Dayong Fan<sup>a\*</sup>, Huidan Lu<sup>a,b,\*</sup> and Xiaobo Chen<sup>b\*</sup>.

<sup>a</sup> *Guangxi Key Laboratory of Electrochemical and Magneto-chemical Functional Materials, College of Chemistry and Bioengineering, Guilin University of Technology, Guilin, 541004, China.*

<sup>b</sup> *Department of Chemistry, University of Missouri – Kansas City, Kansas City, Missouri 64110, United States*

\*Corresponding author

E-mail: dyfan@glut.edu.cn (Dayong Fan),

lhuidangl@163.com (Huidan Lu),

chenxiaobo@umkc.edu (Xiaobo Chen)

**Figure S1-S5.**

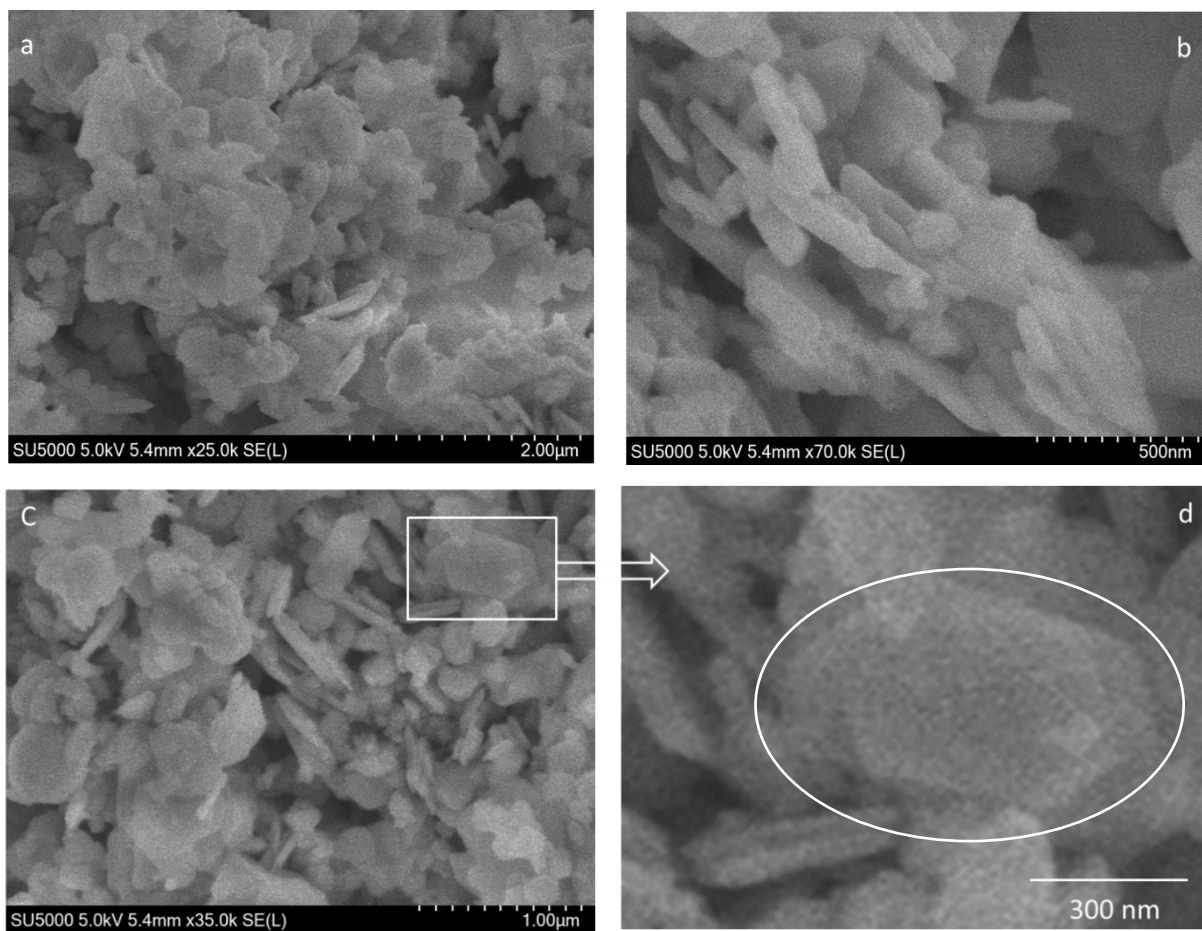

**Fig. S1.** SEM images of the SnS<sub>2</sub>/n-propylamine hybrid at different magnifications (a, b, c, d).

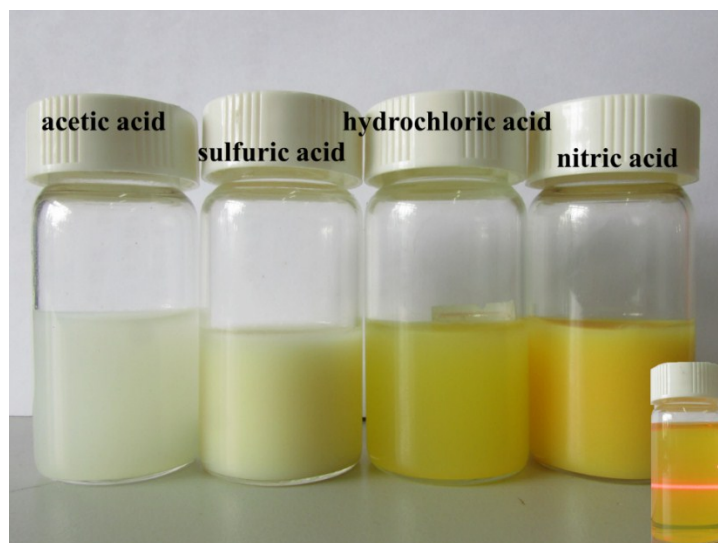

**Fig. S2.** Photographs for the comparison of exfoliation efficiency in various acids.

Fig. S2 show the comparison of exfoliation efficiency of bulk  $\text{SnS}_2/\text{n-propylamine}$  composite in 3 M of acetic acid, sulfuric acid, hydrochloric acid and nitric acid, for 1 h respectively. When the bulk  $\text{SnS}_2/\text{n-propylamine}$  composite was ultrasonicated in acetic acid and sulfuric acid, the milk white color indicates the lower exfoliation efficiency of the bulk  $\text{SnS}_2/\text{n-propylamine}$  composite. The two yellow bottles display that the hydrochloric acid and nitric acid can exfoliate the bulk  $\text{SnS}_2/\text{n-propylamine}$  composite very well, however, the dark yellow color presents the higher exfoliation efficiency of the bulk  $\text{SnS}_2/\text{n-propylamine}$  composite in nitric acid than that in acetic acid. Therefore, the nitric acid was found to be an ideal solvent for the exfoliation of the bulk  $\text{SnS}_2/\text{n-propylamine}$  composite into 2D ultrathin nanomaterial. Exfoliation of the bulk  $\text{SnS}_2/\text{n-propylamine}$  composite in nitric acid could completely destroy and remove the mesophase n-propylamine during the process of sonication and attain to the higher exfoliation efficiency with a good exfoliation state. As observed, most of the proton acid can exfoliate  $\text{SnS}_2/\text{n-propylamine}$  composite, among which nitric acid shows the highest efficiency. The synthetic few-layers  $\text{SnS}_2$  nanosheets were well dispersed in ethanol solution (ethanol/water = 1:1) showing the Tyndall effect.

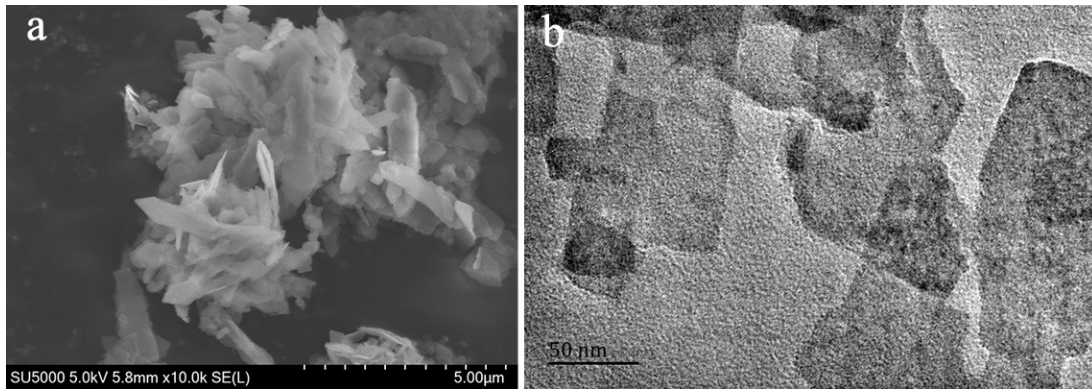

**Fig. S3.** SEM image of  $\text{WO}_3$ /n-propylamine hybrid precursors (a), TEM images (b) of few-layers  $\text{WO}_3$  nanosheets by the same n-propylamine intercalated - exfoliated method.

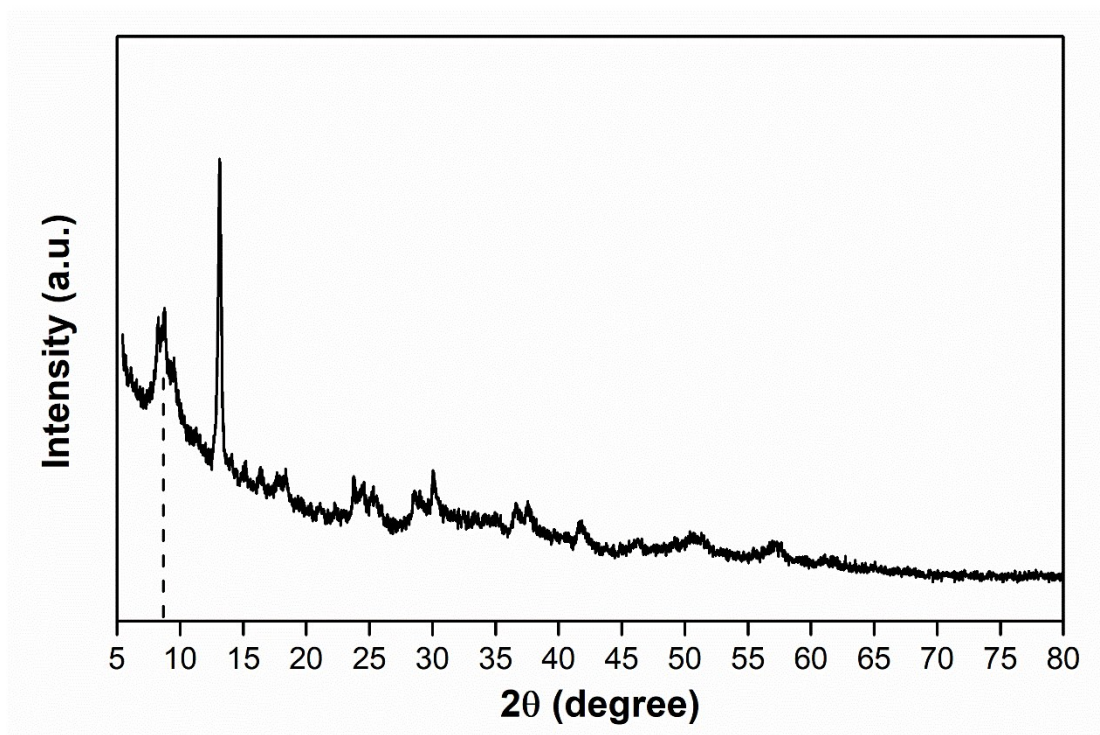

**Fig. S4.** XRD patterns of bulk SnS<sub>2</sub>/n-propylamine.

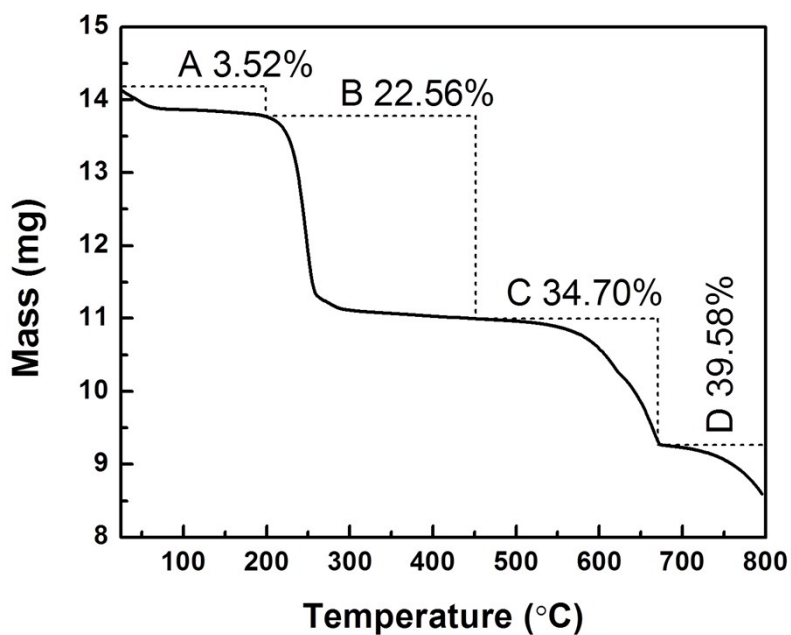

**Fig. S5.** The TG curve of the bulk SnS<sub>2</sub>/n-propylamine composite.

The TG curve of bulk SnS<sub>2</sub>/n-propylamine composite (Fig. S5) shows four steps of weight loss: (1) a 3.52 wt.% weight loss before 200 °C could be caused by the loss of adsorbed water and possibly free n-propylamine adsorbed on the surface of the bulk SnS<sub>2</sub>/n-propylamine composite (step A); (2) Step B indicates a weight loss of 22.56 wt.% over 200-250 °C as a result of the decomposition of n-propylamine intercalated in the lamellar structure of bulk SnS<sub>2</sub>; (3) Step C starts from 450 °C and presents a weight loss of 34.70 wt.% due to the transformation of SnS<sub>2</sub> into the SnS; (4) Step D goes up to 670.7 °C and displays the weight loss is about 39.58 wt.% because of the fractional decomposition and melting of SnS.

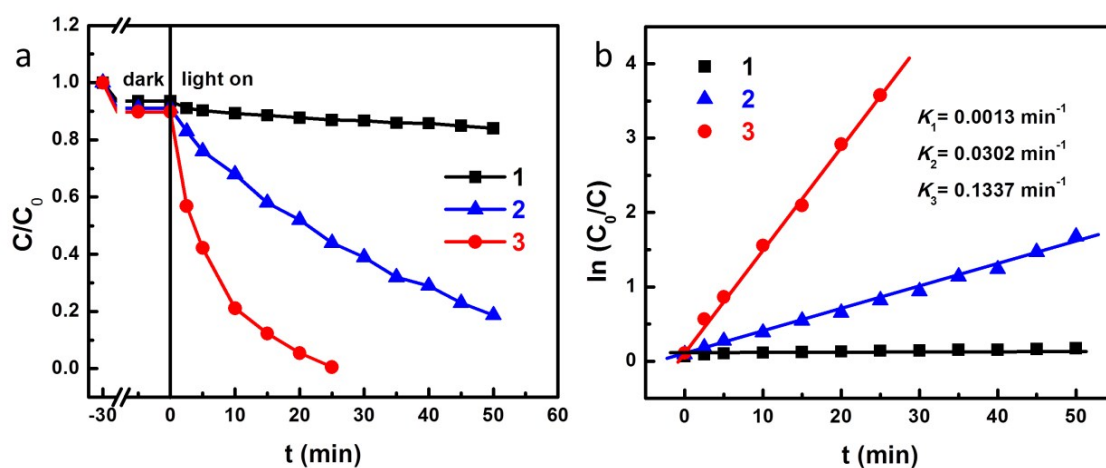

Fig. S6. (a) Photocatalytic degradation of methyl orange (MO) solution (10 mg/L, 100 mL) under visible light irradiation with a 300 W Xe lamp (Perfect Light, PLS-SEX300, a cutoff filter of 420 nm) with 10 mg as-prepared samples: (1) bulk SnS<sub>2</sub>/n-propylamine, (2) bulk SnS<sub>2</sub>, (3) few-layers SnS<sub>2</sub> nanosheets and (b) kinetic linear simulation curves.

Table S1 Summary of photocatalysis activities of Cr(VI) reduction using SnS<sub>2</sub> with various morphologies as photocatalysts in literatures.

| Photocatalysts                        | Amount of catalyst | C <sub>0</sub> , C <sub>r(VI)</sub> | (C <sub>0</sub> -C <sub>t</sub> )/C <sub>0</sub><br>(t=60 min) | The calculated rate constant of per gram catalyst | light source (Xe lamp)    | References                                                |
|---------------------------------------|--------------------|-------------------------------------|----------------------------------------------------------------|---------------------------------------------------|---------------------------|-----------------------------------------------------------|
| SnS <sub>2</sub> quantum dots         | 0.5 g              | 50 mg/L                             | 0.58                                                           | 0.0294 min <sup>-1</sup> g <sup>-1</sup>          | 300 W (λ > 420 nm)        | J.-R. Tu et al. / Materials Letters 185 (2016) 303        |
| Ultrathin SnS <sub>2</sub> nanosheets | 0.5 g              | 50 mg/L                             | 0.48                                                           | 0.0218 min <sup>-1</sup> g <sup>-1</sup>          | 350 W (λ > 420 nm)        | R. Wei et al. /Acta Materialia 66 (2014) 163              |
| SnS <sub>2</sub> nanocrystals         | 0.3 g              | 50 mg/L                             | 0.90                                                           | 0.1313 min <sup>-1</sup> g <sup>-1</sup>          | 250W Xe lamp (λ > 420 nm) | Y. C. Zhang et al. /Environ. Sci. Technol. 2011, 45, 9324 |
| 2D SnS <sub>2</sub> nanosheets        | 0.1 g              | 50 mg/L                             | 0.53                                                           | 0.1436 min <sup>-1</sup> g <sup>-1</sup>          | 300 W (λ > 420 nm)        | This work                                                 |



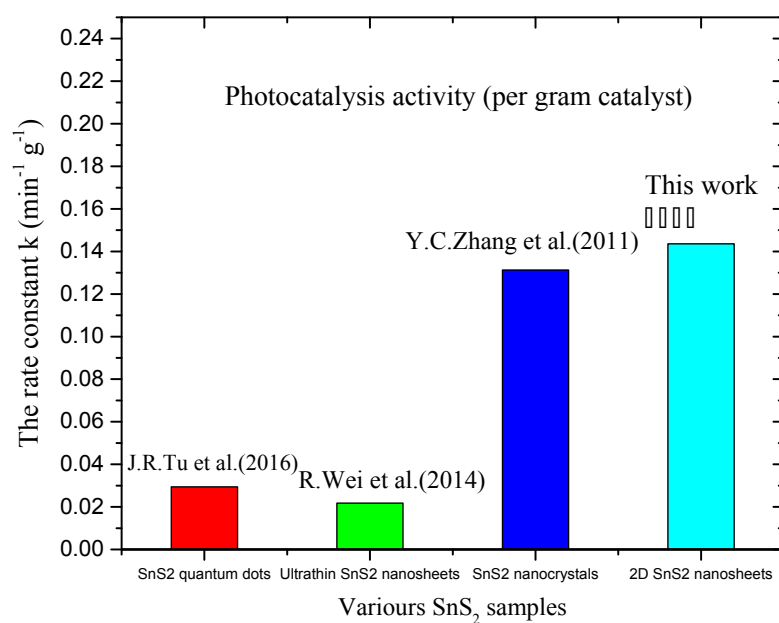

**Fig. S7.** The calculated rate constant of per gram catalyst (suppose all degradation curves follow a pseudo-first-order model) vs. SnS<sub>2</sub> with various morphology reported in literatures.

References:

- [1] Y. C. Zhang et al. *Environ. Sci. Technol.* 2011, 45, 9324–9331
- [2] J.-R. Tu et al. *Materials Letters* 2016, 185, 303–306
- [3] R. Wei et al. *Acta Materialia* 2014, 66, 163–171
